# Supplementary material for: Extrasynaptic N-Methyl-d-aspartate (NMDA) Receptor Stimulation Induces Cytoplasmic Translocation of the CDKL5 Kinase and Its Proteasomal Degradation
Source: PubMed Central journal article supplement — J Biol Chem. 2011 Aug 5;286(42):36550–8. doi: 10.1074/jbc.M111.235630 (PMC3196071; doi:10.1074/jbc.m111.235630), 2011-08-05

## SUPPLEMENTAL DATA

Fig. S1. CDKL5 is efficiently exported to the somatic cytoplasm upon glutamate stimulation. Hippocampal neurons at DIV 10 were treated with glutamate 10  $\mu$ M for 10 min (lower panels, *Glut*) or left untreated (upper panels, *KRH*) and stained with anti -CDKL5 (green), -VGLUT1 (red) and DAPI (blue). Overlays are shown on the right. The *Scale bar* is 10  $\mu$ m.

Fig. S2. EGTA and AP5 treatments by themselves do not alter endogenous CDKL5 expression level. Hippocampal neurons at DIV 10 were treated for 3 hrs with glutamate 10  $\mu$ M (*Glut*), EGTA 2mM (*EGTA*) or AP5 100  $\mu$ M (*AP5*) or left untreated.  $\beta$ -tubulin III (*TUJ1*) was used as internal standard.

Fig. S3. Glutamate-induced CDKL5 degradation is not due to proteolytic cleavage. Analysis of CDKL5 levels by Western blotting in untreated hippocampal neurons (*CTRL*) or treated for 3 hrs with glutamate 10  $\mu$ M (*Glut*).  $\beta$ -tubulin III (*TUJ1*) was used as internal standard.

Fig. S1

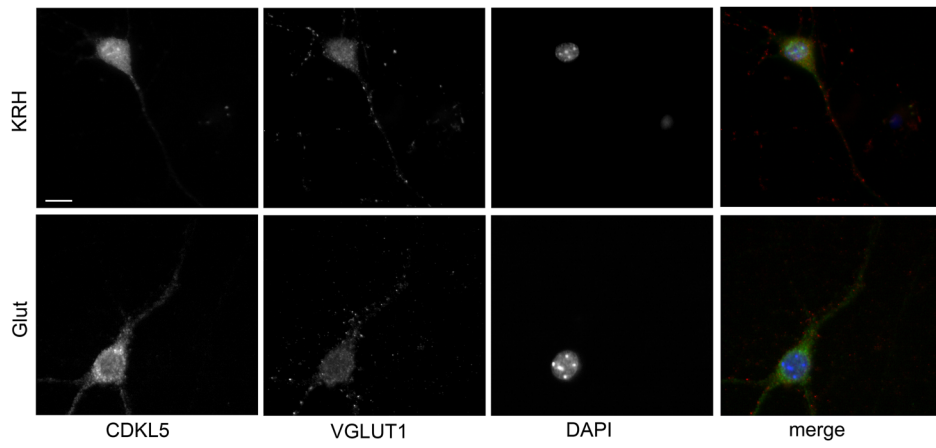

Fig. S2

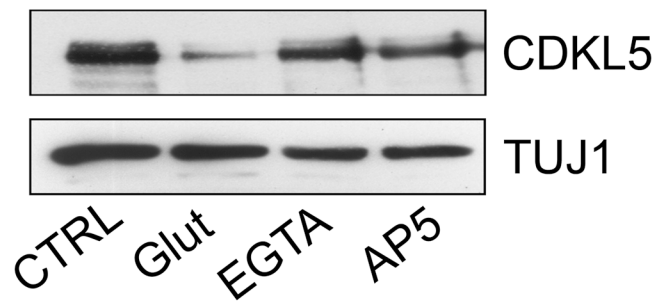

Fig. S3

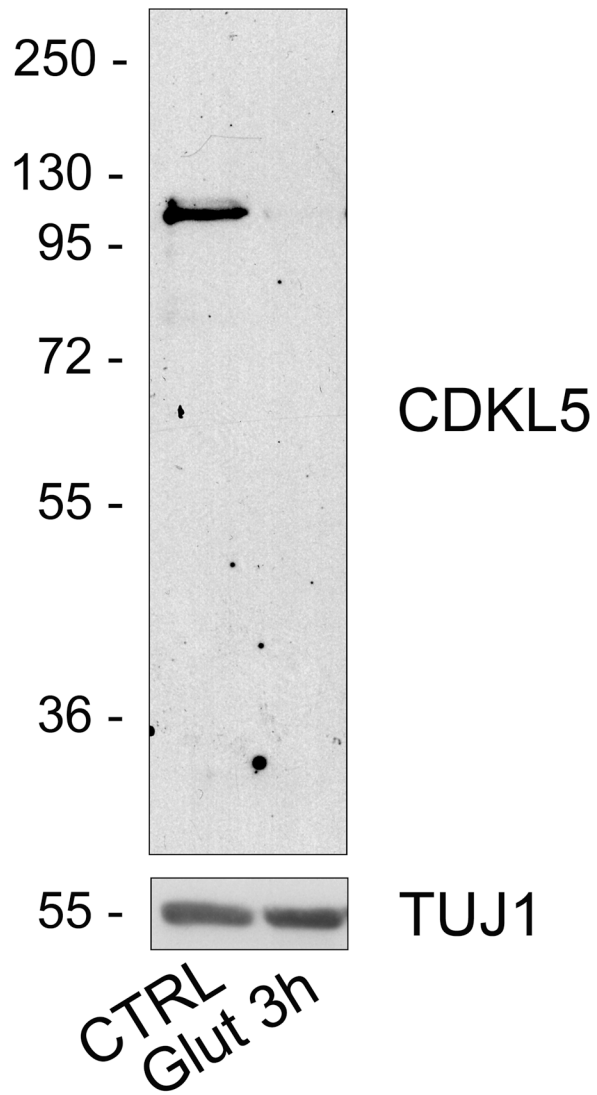

Supplement: supp_M111.235630_jbc.M111.235630-1.pdf [file supp_M111.235630_jbc.M111.235630-1.pdf]
